# Supplementary material for: Lunasin Alleviates Allergic Airway Inflammation while Increases Antigen-Specific Tregs
Source: PLOS journal article supplement (doi:10.1371/journal.pone.0115330), 2015-02-03
Supplement: S1 (10.1371/journal.pone.0115330.s001) [file journal.pone.0115330.s001]

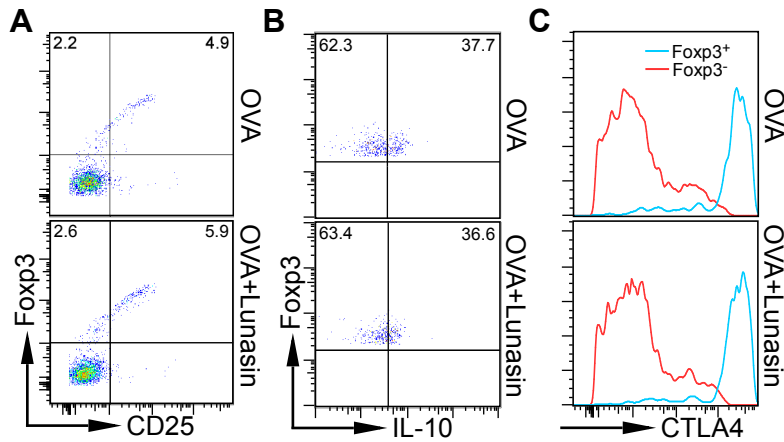

**Figure S1. Characterization of OVA-specific regulatory T cells in the mediastinal lymph nodes.**

Naive CD4<sup>+</sup> T cells were purified from Fcγp3<sup>eGFP</sup> DO11.10 mice using MACS (Miltenyi).  $2 \times 10^6$  cells were adoptively transferred into wild type BALB/c mice and the recipients were treated intranasally with 100  $\mu$ g OVA in the presence or absence of 20  $\mu$ g lunasin. 14 days after the last treatment, mediastinal lymph nodes (MedLN) were collected for analysis. **(A)** Expression of CD25 and Fcγp3 by the DO11.10 T cells. **(B)** Expression of IL-10 (intracellular staining) by Fcγp3<sup>+</sup> DO11.10 T cells. **(C)** Expression of CTLA-4 (intracellular staining) by Fcγp3<sup>+</sup> and Fcγp3<sup>-</sup> DO11.10 T cells.
